# Supplementary material for: Place, Race, and Lapses in Diabetic Retinopathy Care
Source: PubMed Central journal article supplement (PMC11046402; doi:10.1001/jamaophthalmol.2024.0974), 2024-04-25
Supplement: jamaophthalmol-e240974-s001.pdf [file jamaophthalmol-e240974-s001.pdf]

## Supplemental Online Content

Tang T, Tran D, Han D, Zeger SL, Crews DC, Cai CX. Place, race, and lapses in diabetic retinopathy care. *JAMA Ophthalmol*. Published online April 25, 2024. doi:10.1001/jamaophthalmol.2024.0974

### **eMethods.** Statistical Methods

This supplemental material has been provided by the authors to give readers additional information about their work.

**eMethods.** Statistical Methods

Statistical significance was set at  $P < .05$ . Analyses were performed using Stata statistical software version 18 (StataCorp) and Python programming language version 3.8.5 (Python Software Foundation).
