# Supplementary material for: Place, Race, and Lapses in Diabetic Retinopathy Care
Source: PubMed Central journal article supplement (PMC11046402; doi:10.1001/jamaophthalmol.2024.0974), 2024-04-25
Supplement: jamaophthalmol-e240974-s002.pdf [file jamaophthalmol-e240974-s002.pdf]

## **Data Sharing Statement**

Tang. Place, Race, and Lapses in Diabetic Retinopathy Care. *JAMA Ophthalmol.*  
Published April 25, 2024. doi:110.1001/jamaophthalmol.2024.0974

## **Data**

**Data available:** No
